# Supplementary material for: Enrichr: interactive and collaborative HTML5 gene list enrichment analysis tool
Source: Springer Nature journal article supplement (doi:10.1186/1471-2105-14-128), 2013-04-15
Supplement: 12859_2013_5841_MOESM7_ESM.pdf [file 12859_2013_5841_MOESM7_ESM.pdf]

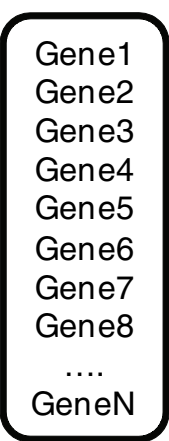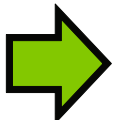

Enrichr

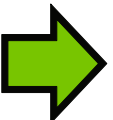

35 Gene Set Libraries

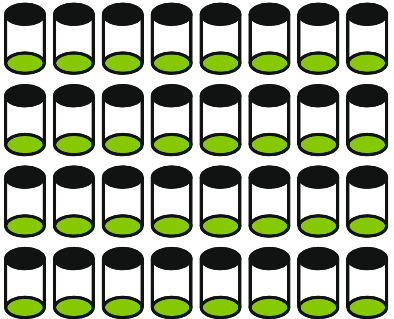

Input gene lists

Tables

| Term               | Overlap | P-value   | Z-score   | Combined Score |
|--------------------|---------|-----------|-----------|----------------|
| MP0000609_a 13/442 |         | 2.87E-05  | -1.693546 | 17.7139178     |
| MP0002118_a 14/694 |         | 6.78E-04  | -2.374911 | 17.3269922     |
| MP0006036_a 6/107  |         | 1.92E-04  | -1.881197 | 16.09821523    |
| MP0000955_a 8/245  |         | 5.78E-04  | -1.864356 | 13.89912657    |
| MP0005266_a 5/100  |         | 0.001104  | -1.869102 | 12.72630872    |
| MP0009765_a 5/108  |         | 0.0015322 | -1.861359 | 12.06352873    |
| MP0002752_a 14/676 |         | 5.25E-04  | -1.480832 | 11.18346686    |
| MP0000598_a 12/586 |         | 0.0015077 | -1.504539 | 9.775220763    |
| MP0005332_a 5/134  |         | 0.0037768 | -1.735447 | 9.681851103    |

Grids

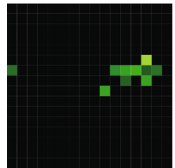

Networks

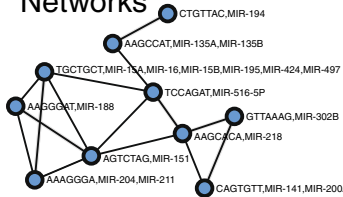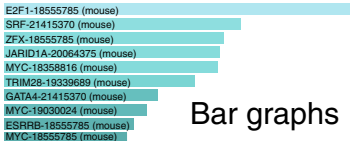

Bar graphs
