# Supplementary figures and images for: Enrichr: interactive and collaborative HTML5 gene list enrichment analysis tool
Source: Springer Nature journal article supplement (doi:10.1186/1471-2105-14-128), 2013-04-15

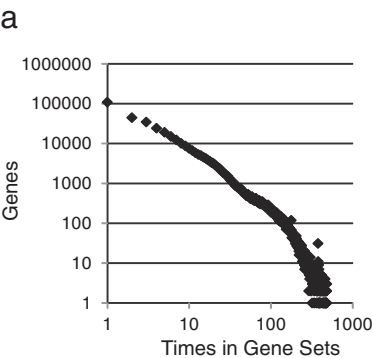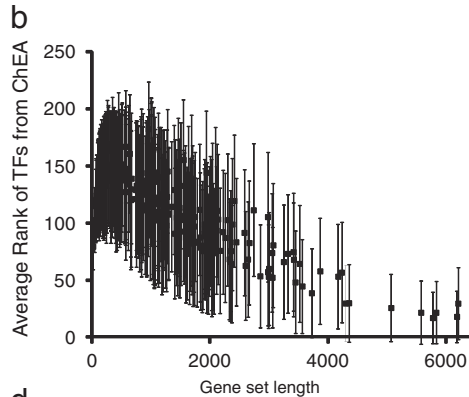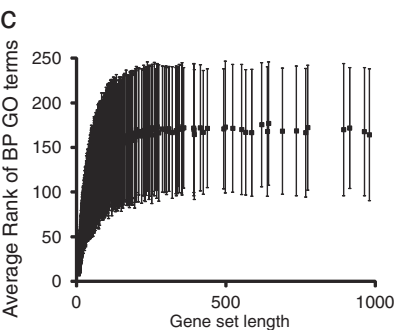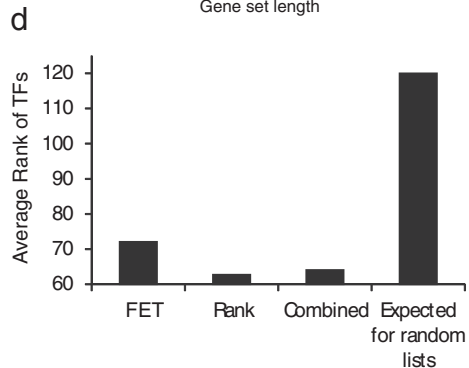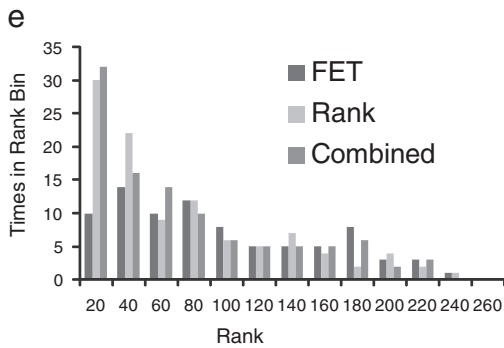

Supplement: 12859_2013_5841_MOESM8_ESM.pdf [file 12859_2013_5841_MOESM8_ESM.pdf]

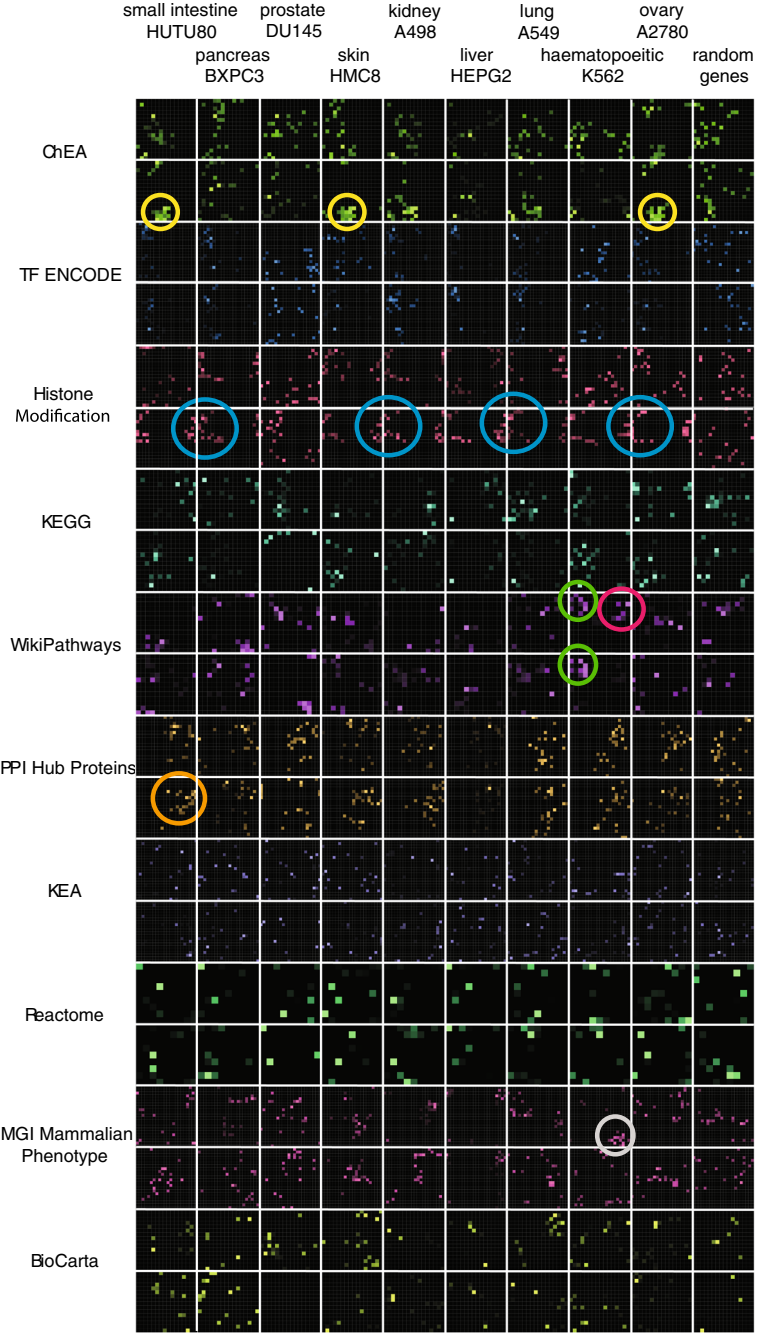

Supplement: 12859_2013_5841_MOESM9_ESM.pdf [file 12859_2013_5841_MOESM9_ESM.pdf]
